# Supplementary material for: MiR-206 inhibits proliferation, migration, and invasion of gastric cancer cells by targeting the MUC1 gene
Source: PubMed Central journal article supplement — Onco Targets Ther. 2019 Jan 25;12:849–59. doi: 10.2147/OTT.S180021 (PMC6355168; doi:10.2147/ott.s180021), 2019-01-25
Supplement: OTT-12-849-180021-1.pdf [file OTT-12-849-180021-1.pdf]

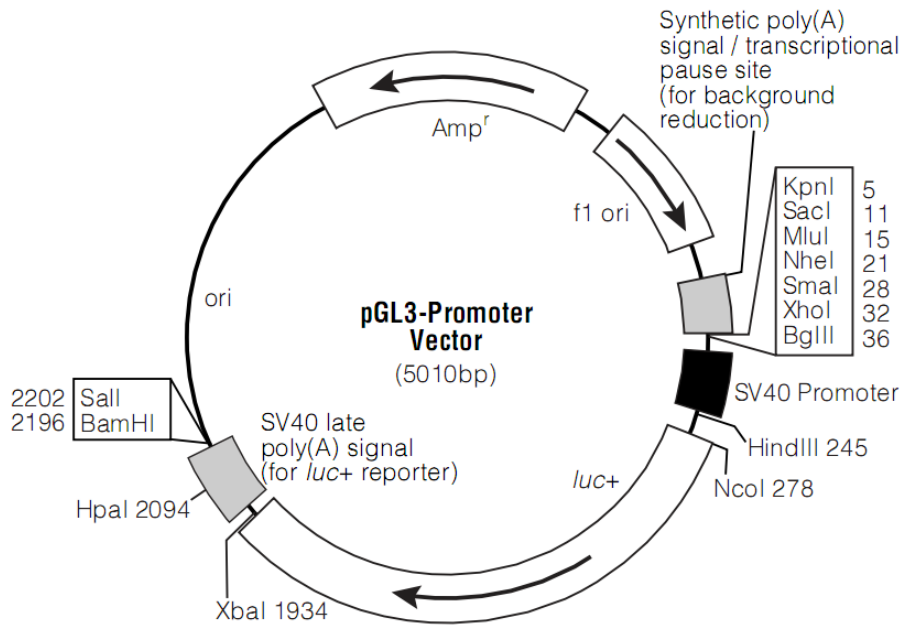

0748VA08\_4A

The profiles of PGL3-promotor

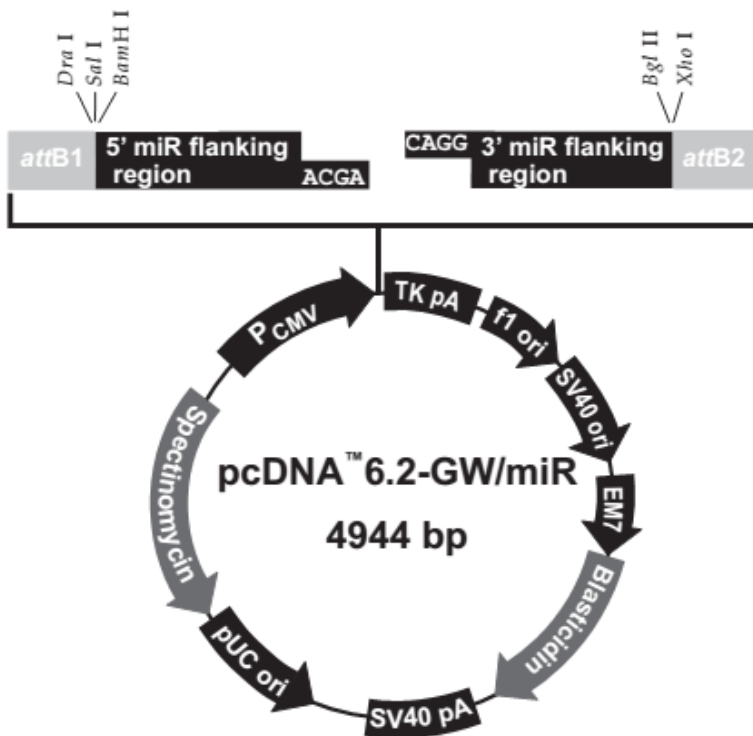

The profiles of pcDNA<sup>TM</sup>6.2

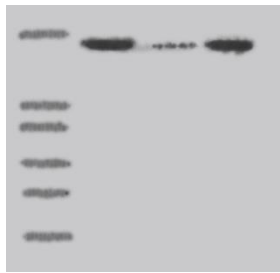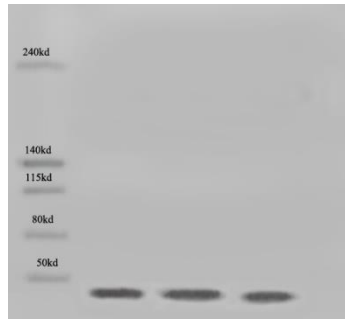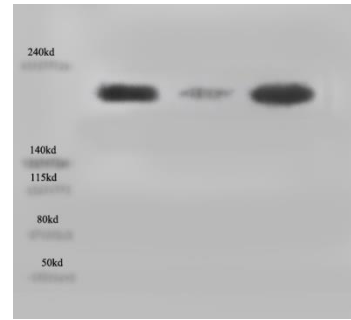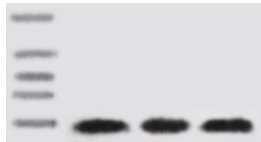

Uncropped Western Blot results of plasmids
